# Supplementary figures and images for: Interactions and Insertion of Escherichia coli Hfq into Outer Membrane Vesicles as Revealed by Infrared and Orientated Circular Dichroism Spectroscopies
Source: MDPI journal article supplement (doi:10.3390/ijms241411424), 2023-07-13

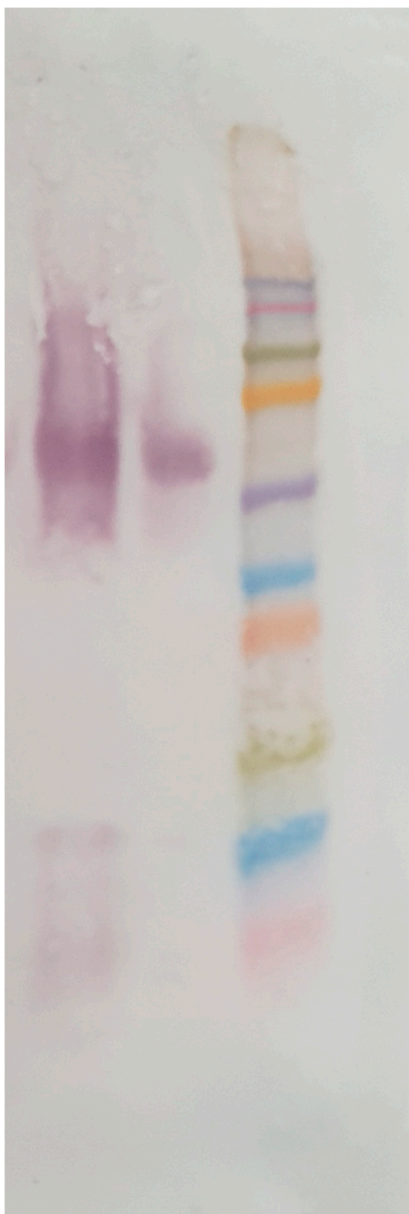

Figure S1: OMV extracted from  $\Delta hfq$  strain observed by TEM (negative 425 staining).

Supplement: s1 [file s1]
